# Supplementary material for: Multifactorial analysis of temperature, solute-to-solvent ratio, and ultrasound amplitude on the extraction of phenolic and antioxidant compounds from Aloysia citriodora Palau leaves
Source: PeerJ. 2025 Aug 19;13:e19821. doi: 10.7717/peerj.19821 (PMC12372784; doi:10.7717/peerj.19821)
Supplement: Supplemental Information 9 [file peerj-13-19821-s009.xlsx]

## Sheet: Determination of Solids Present
	capsule 1	24.8611	24.8568		24.859
	capsule 2	24.9327	24.9324		24.9325
	capsule 3	23.5195	23.5182		23.5189
	capsule 4	23.586	23.585		23.5855
	capsule 5	27.8037	27.8056		27.8046
	capsule 6	23.0872	23.0873		23.0872
						Total solids			average
1	capsule 1	T2R3A1	0.9746	24.8663	T2R3A1	0.00735		T2R3A1	0.0078	0.000636396
	capsule 2	T2R3A1	0.9689	24.9408	T2R3A1	0.00825		T3R3A3	0.009625	0.00130815
2	capsule 3	T3R3A3	0.9789	23.5294	T3R3A3	0.01055		T2R3A2	0.00933	2.82843e-05
	capsule 4	T3R3A3	0.9788	23.5942	T3R3A3	0.0087
3	capsule 5	T2R3A2	0.9702	27.814	T2R3A2	0.00935
	capsule 6	T2R3A2	0.9739	23.0966	T2R3A2	0.00931
								Total solids				average	standard deviation.
4	capsule 1	24.852	T2R1A1	0.9707		24.8815	T2R1A1	0.0295			T2R1A1	0.0356	0.0086267
	capsule 2	24.93	T2R1A1	0.9783		24.9717	T2R1A1	0.0417			T3R3A2	0.00585	0.0033234
5	capsule 3	23.5156	T3R3A2	0.9642		23.5238	T3R3A2	0.0082			T2R3A3	0.0015	0.000282843
	capsule 4	23.5845	T3R3A2	0.9593		23.588	T3R3A2	0.0035
6	capsule 5	27.8018	T2R3A3	0.959		27.8031	T2R3A3	0.0013
	capsule 6	23.0848	T2R3A3	0.9631		23.0865	T2R3A3	0.0017
								Total solids				average	standard deviation.
7	capsule 1	24.8526	T3R3A1	0.9507		24.8553	T3R3A1	0.0027			T3R3A1	0.0026	0.000141421
	capsule 2	24.9293	T3R3A1	0.9457		24.9318	T3R3A1	0.0025			T3R2A2	0.00995	0.00516188
8	capsule 3	23.5201	T3R2A2	0.9425		23.5264	T3R2A2	0.0063			T3R2A1	0.0282	0.0141421
	capsule 4	23.5822	T3R2A2	0.9518		23.5958	T3R2A2	0.0136
9	capsule 5	27.8012	T3R2A1	0.9274		27.8194	T3R2A1	0.0182
	capsule 6	23.0849	T3R2A1	0.949		23.1231	T3R2A1	0.0382
								Total solids				average	standard deviation.
10	capsule 1	24.8524	T3R1A2	0.9818		24.9024	T3R1A2	0.05			T3R1A2	0.04645	0.00502046
	capsule 2	24.931	T3R1A2	0.9913		24.9739	T3R1A2	0.0429			T3R1A3	0.0464	0.000989949
11	capsule 3	23.52	T3R1A3	0.9927		23.5657	T3R1A3	0.0457			T3R2A3	0.01825	0.00304056
	capsule 4	23.5816	T3R1A3	1.0043		23.6287	T3R1A3	0.0471
12	capsule 5	27.7992	T3R2A3	0.97		27.8196	T3R2A3	0.0204
	capsule 6	23.0842	T3R2A3	0.9753		23.1003	T3R2A3	0.0161
								Total solids				average	standard deviation.
13	capsule 1	24.8557	T1R3A2	0.9684		24.8569	T1R3A2	0.0012			T1R3A2	0.00285	0.00233345
	capsule 2	24.9312	T1R3A2	0.9701		24.9357	T1R3A2	0.0045			T2R1A2	0.0302	0.00311127
14	capsule 3	23.5223	T2R1A2	0.991		23.5503	T2R1A2	0.028			T1R2A3	0.00705	0.00190919
	capsule 4	23.5804	T2R1A2	0.9838		23.6128	T2R1A2	0.0324
15	capsule 5	27.8005	T1R2A3	0.96593		27.8062	T1R2A3	0.0057
	capsule 6	23.0856	T1R2A3	0.9761		23.094	T1R2A3	0.0084
												average	standard deviation.
16	capsule 1	24.8526	T3R1A1	0.9667		24.9156	T3R1A1	0.063			T3R1A1	0.05065	0.0174655
	capsule 2	24.9303	T3R1A1	0.9988		24.9686	T3R1A1	0.0383			T1R1A2	0.03035	0.00417193
17	capsule 3	23.5193	T1R1A2	0.9711		23.5526	T1R1A2	0.0333			T1R1A3	0.03055	0.00502046
	capsule 4	23.5826	T1R1A2	0.9942		23.61	T1R1A2	0.0274
18	capsule 5	27.803	T1R1A3	0.9721		27.83	T1R1A3	0.027
	capsule 6	23.0858	T1R1A3	0.9928		23.1199	T1R1A3	0.0341
								Total solids				average	standard deviation.
19	capsule 1	24.8527	T2R1A3	0.9723		24.886	T2R1A3	0.0333			T2R1A3	0.0326	0.000989949
	capsule 2	24.931	T2R1A3	0.9941		24.9629	T2R1A3	0.0319			T1R2A2	0.0204	0.0120208
20	capsule 3	23.519	T1R2A2	0.9693		23.5479	T1R2A2	0.0289			T1R3A3	0.02245	0.019304
	capsule 4	23.5831	T1R2A2	0.987		23.595	T1R2A2	0.0119
21	capsule 5	27.8006	T1R3A3	0.965		27.8094	T1R3A3	0.0088
	capsule 6	23.056	T1R3A3	0.987		23.0921	T1R3A3	0.0361
								Total solids				average	standard deviation.
22	capsule 5	27.8072	T1R1A1	1.016		27.8439	T1R1A1	0.0367			T1R1A1	0.0405	0.00537401
	capsule 6	23.084	T1R1A1	1.0372		23.1283	T1R1A1	0.0443
								Total solids				average	standard deviation.
23	capsule5	27.8002	T1R2A1	0.9752		27.8389	T1R2A1	0.0387			T1R2A1	0.0365	0.00311127
	capsule 6	23.0859	T1R2A1	0.9921		23.1202	T1R2A1	0.0343
								Total solids				average	standard deviation.
24	capsule 1	24.875	T1R3A1	0.9632		24.8888	T1R3A1	0.0138			T1R3A1	0.0324	0.0263044
	capsule 2	24.9351	T1R3A1	0.9718		24.9861	T1R3A1	0.051
								Total solids				average	standard deviation.
25	capsule 3	23.5119	T2R2A3	0.956		23.5319	T2R2A3	0.02			T2R2A3	0.01875	0.00176777
	capsule 4	23.5815	T2R2A3	0.9758		23.599	T2R2A3	0.0175
								Total solids				average	standard deviation.
26	capsule 1	24.8504	T2R2A2	0.9499		24.8601	T2R2A2	0.0097			T2R2A2	0.00775	0.00275772
	capsule 2	24.9294	T2R2A2	0.9648		24.9352	T2R2A2	0.0058
								Total solids				average	standard deviation.
27	capsule 3	23.5142	T2R2A1	0.9645		23.5206	T2R2A1	0.0064			T2R2A1	0.00545	0.0013435
	capsule 4	23.5828	T2R2A1	0.9675		23.5873	T2R2A1	0.0045

## Sheet: pt 2 Determination of Solids (m
		Experimental treatment	g/ml		mg/ml	mg/ml
		T2R3A1	0.00735		7.35	7.8
		T2R3A1	0.00825		8.25
		T3R3A3	0.01055		10.55	9.625
		T3R3A3	0.0087		8.7
		T2R3A2	0.00935		9.35	9.33
		T2R3A2	0.00931		9.31
		T2R1A1	0.0295		29.5	35.6
		T2R1A1	0.0417		41.7
		T3R3A2	0.0082		8.2	5.85
		T3R3A2	0.0035		3.5
		T2R3A3	0.0013		1.3	1.5
		T2R3A3	0.0017		1.7
		T3R3A1	0.0027		2.7	2.6
		T3R3A1	0.0025		2.5
		T3R2A2	0.0063		6.3	9.95
		T3R2A2	0.0136		13.6
		T3R2A1	0.0182		18.2	28.2
		T3R2A1	0.0382		38.2
		T3R1A2	0.05		50	46.45
		T3R1A2	0.0429		42.9
		T3R1A3	0.0457		45.7	46.4
		T3R1A3	0.0471		47.1
		T3R2A3	0.0204		20.4	18.25
		T3R2A3	0.0161		16.1
		T1R3A2	0.0012		1.2	2.85
		T1R3A2	0.0045		4.5
		T2R1A2	0.028		28	30.2
		T2R1A2	0.0324		32.4
		T1R2A3	0.0057		5.7	7.05
		T1R2A3	0.0084		8.4
		T3R1A1	0.063		63	50.65
		T3R1A1	0.0383		38.3
		T1R1A2	0.0333		33.3	30.35
		T1R1A2	0.0274		27.4
		T1R1A3	0.027		27	30.55
		T1R1A3	0.0341		34.1
		T2R1A3	0.0333		33.3	32.6
		T2R1A3	0.0319		31.9
		T1R2A2	0.0289		28.9	20.4
		T1R2A2	0.0119		11.9
		T1R3A3	0.0088		8.8	22.45
		T1R3A3	0.0361		36.1
		T1R1A1	0.0367		36.7	40.5
		T1R1A1	0.0443		44.3
		T1R2A1	0.0387		38.7	36.5
		T1R2A1	0.0343		34.3
		T1R3A1	0.0138		13.8	32.4
		T1R3A1	0.051		51
		T2R2A3	0.02		20	18.75
		T2R2A3	0.0175		17.5
		T2R2A2	0.0097		9.7	7.75
		T2R2A2	0.0058		5.8
		T2R2A1	0.0064		6.4	5.45
		T2R2A1	0.0045		4.5

## Sheet: Polyphenols (mg GAE g of extrac
Polyphenols				mg (milligrams)	micrograms of gallic acid	Total solid extract (g/ml)		1 g of extract contains micrograms of gallic acid	mg Gallic Acid Equivalents (GAE) per g of extract	average	standard deviation.
		T2R3A3	Extracto solido totales (mg/ml)	8.5	818.529	0.0085		96297.6	96.2976	80.4383	13.9129
		T2R3A3	Extracto solido totales (mg/ml)	8.5	635.196	0.0085		74729	74.729
		T2R3A3	Extracto solido totales (mg/ml)	8.5	597.451	0.0085		70288.4	70.2884
		T2R3A1	Extracto solido totales (mg/ml)	7.8	500.392	0.0078		64152.8	64.1528	68.0702	3.41011
		T2R3A1	Extracto solido totales (mg/ml)	7.8	543.529	0.0078		69683.3	69.6833
		T2R3A1	Extracto solido totales (mg/ml)	7.8	548.922	0.0078		70374.6	70.3746
		T2R3A2	Extracto solido totales (mg/ml)	9.33	414.118	0.00933		44385.6	44.3856	44.7709	2.33571
		T2R3A2	Extracto solido totales (mg/ml)	9.33	397.941	0.00933		42651.8	42.6518
		T2R3A2	Extracto solido totales (mg/ml)	9.33	441.078	0.00933		47275.3	47.2753
		T3R3A3	Extracto solido totales (mg/ml)	9.625	619.02	0.009625		64313.7	64.3137	67.3016	7.20347
		T3R3A3	Extracto solido totales (mg/ml)	9.625	597.451	0.009625		62072.8	62.0728
		T3R3A3	Extracto solido totales (mg/ml)	9.625	726.863	0.009625		75518.2	75.5182
		T2R1A1	Extracto solido totales (mg/ml)	35.6	1972.45	0.0356		55405.9	55.4059	56.5167	1.79429
		T2R1A1	Extracto solido totales (mg/ml)	35.6	2085.69	0.0356		58586.7	58.5867
		T2R1A1	Extracto solido totales (mg/ml)	35.6	1977.84	0.0356		55557.4	55.5574
		T3R3A1	Extracto solido totales (mg/ml)	6.6	586.667	0.0066		88888.9	88.8889	92.7015	8.81192
		T3R3A1	Extracto solido totales (mg/ml)	6.6	570.49	0.0066		86437.9	86.4379
		T3R3A1	Extracto solido totales (mg/ml)	6.6	678.333	0.0066		102778	102.778
		T3R3A2	Extracto solido totales (mg/ml)	5.58	548.922	0.00558		98373	98.373	87.7433	17.5809
		T3R3A2	Extracto solido totales (mg/ml)	5.58	543.529	0.00558		97406.7	97.4067
		T3R3A2	Extracto solido totales (mg/ml)	5.58	376.373	0.00558		67450.3	67.4503
		T3R2A2	Extracto solido totales (mg/ml)	9.95	1303.82	0.00995		131038	131.038	132.844	3.12881
		T3R2A2	Extracto solido totales (mg/ml)	9.95	1357.75	0.00995		136457	136.457
		T3R2A2	Extracto solido totales (mg/ml)	9.95	1303.82	0.00995		131038	131.038
		T3R2A1	Extracto solido totales (mg/ml)	28.2	1158.24	0.0282		41072.2	41.0722	41.3909	0.551979
		T3R2A1	Extracto solido totales (mg/ml)	28.2	1158.24	0.0282		41072.2	41.0722
		T3R2A1	Extracto solido totales (mg/ml)	28.2	1185.2	0.0282		42028.2	42.0282
		T3R1A3	Extracto solido totales (mg/ml)	46.4	2991.57	0.0464		64473.5	64.4735	68.9282	4.04628
		T3R1A3	Extracto solido totales (mg/ml)	46.4	3245	0.0464		69935.3	69.9353
		T3R1A3	Extracto solido totales (mg/ml)	46.4	3358.24	0.0464		72375.8	72.3758
		T3R1A2	Extracto solido totales (mg/ml)	46.45	1767.55	0.04645		38052.7	38.0527	40.297	2.39128
		T3R1A2	Extracto solido totales (mg/ml)	46.45	1859.22	0.04645		40026.2	40.0262
		T3R1A2	Extracto solido totales (mg/ml)	46.45	1988.63	0.04645		42812.2	42.8122
		T3R2A3	Extracto solido totales (mg/ml)	18.25	856.275	0.01825		46919.2	46.9192	49.0859	1.89955
		T3R2A3	Extracto solido totales (mg/ml)	18.25	910.196	0.01825		49873.8	49.8738
		T3R2A3	Extracto solido totales (mg/ml)	18.25	920.98	0.01825		50464.7	50.4647
		T3R1A1	Extracto solido totales (mg/ml)	50.65	1940.1	0.05065		38304	38.304	40.6461	2.03111
		T3R1A1	Extracto solido totales (mg/ml)	50.65	2123.43	0.05065		41923.6	41.9236
		T3R1A1	Extracto solido totales (mg/ml)	50.65	2112.65	0.05065		41710.7	41.7107
		T2R1A2	Extracto solido totales (mg/ml)	30.2	1697.45	0.0302		56207	56.207	58.6471	2.82498
		T2R1A2	Extracto solido totales (mg/ml)	30.2	1864.61	0.0302		61742	61.742
		T2R1A2	Extracto solido totales (mg/ml)	30.2	1751.37	0.0302		57992.5	57.9925
		T1R3A2	Extracto solido totales (mg/ml)	22.85	457.255	0.02285		20011.2	20.0112	20.7191	1.02862
		T1R3A2	Extracto solido totales (mg/ml)	22.85	462.647	0.02285		20247.1	20.2471
		T1R3A2	Extracto solido totales (mg/ml)	22.85	500.392	0.02285		21899	21.899
		T1R2A3	Extracto solido totales (mg/ml)	7.05	424.902	0.00705		60269.8	60.2698	55.9357	3.92488
		T1R2A3	Extracto solido totales (mg/ml)	7.05	387.157	0.00705		54915.9	54.9159
		T1R2A3	Extracto solido totales (mg/ml)	7.05	370.98	0.00705		52621.3	52.6213
		T1R1A2	Extracto solido totales (mg/ml)	30.35	1093.53	0.03035		36030.6	36.0306	38.1034	1.89972
		T1R1A2	Extracto solido totales (mg/ml)	30.35	1169.02	0.03035		38517.9	38.5179
		T1R1A2	Extracto solido totales (mg/ml)	30.35	1206.76	0.03035		39761.6	39.7616
		T1R1A3	Extracto solido totales (mg/ml)	30.55	1336.18	0.03055		43737.4	43.7374	44.7375	0.905741
		T1R1A3	Extracto solido totales (mg/ml)	30.55	1373.92	0.03055		44972.9	44.9729
		T1R1A3	Extracto solido totales (mg/ml)	30.55	1390.1	0.03055		45502.4	45.5024
		T2R1A3	Extracto solido totales (mg/ml)	32.06	1902.35	0.03206		59337.3	59.3373	60.6828	1.43701
		T2R1A3	Extracto solido totales (mg/ml)	32.06	1940.1	0.03206		60514.6	60.5146
		T2R1A3	Extracto solido totales (mg/ml)	32.06	1994.02	0.03206		62196.5	62.1965
		T1R2A2	Extracto solido totales (mg/ml)	20.4	1071.96	0.0204		52547.1	52.5471	53.0757	0.699329
		T1R2A2	Extracto solido totales (mg/ml)	20.4	1077.35	0.0204		52811.4	52.8114
		T1R2A2	Extracto solido totales (mg/ml)	20.4	1098.92	0.0204		53868.7	53.8687
		T1R3A3	Extracto solido totales (mg/ml)	22.45	317.059	0.02245		14122.9	14.1229	15.3238	1.49996
		T1R3A3	Extracto solido totales (mg/ml)	22.45	333.235	0.02245		14843.4	14.8434
		T1R3A3	Extracto solido totales (mg/ml)	22.45	381.765	0.02245		17005.1	17.0051
		T1R1A1	Extracto solido totales (mg/ml)	40.5	1557.25	0.0405		38450.7	38.4507	43.51	4.43177
		T1R1A1	Extracto solido totales (mg/ml)	40.5	1837.65	0.0405		45374	45.374
		T1R1A1	Extracto solido totales (mg/ml)	40.5	1891.57	0.0405		46705.4	46.7054
		T1R2A1	Extracto solido totales (mg/ml)	36.5	726.863	0.0365		19914	19.914	20.9974	0.983637
		T1R2A1	Extracto solido totales (mg/ml)	36.5	775.392	0.0365		21243.6	21.2436
		T1R2A1	Extracto solido totales (mg/ml)	36.5	796.961	0.0365		21834.5	21.8345
		T1R3A1	Extracto solido totales (mg/ml)	32.4	31.2745	0.0324		965.263	0.965263	3.35068	2.10731
		T1R3A1	Extracto solido totales (mg/ml)	32.4	133.725	0.0324		4127.33	4.12733
		T1R3A1	Extracto solido totales (mg/ml)	32.4	160.686	0.0324		4959.45	4.95945
		T2R2A3	Extracto solido totales (mg/ml)	18.75	694.51	0.01875		37040.5	37.0405	40.3956	2.90917
		T2R2A3	Extracto solido totales (mg/ml)	18.75	786.176	0.01875		41929.4	41.9294
		T2R2A3	Extracto solido totales (mg/ml)	18.75	791.569	0.01875		42217	42.217
		T2R2A2	Extracto solido totales (mg/ml)	7.75	478.824	0.00775		61783.7	61.7837	66.4221	4.07679
		T2R2A2	Extracto solido totales (mg/ml)	7.75	527.353	0.00775		68045.5	68.0455
		T2R2A2	Extracto solido totales (mg/ml)	7.75	538.137	0.00775		69437.1	69.4371
		T2R2A1	Extracto solido totales (mg/ml)	5.45	338.627	0.00545		62133.5	62.1335	67.4102	4.67566
		T2R2A1	Extracto solido totales (mg/ml)	5.45	387.157	0.00545		71038	71.038
		T2R2A1	Extracto solido totales (mg/ml)	5.45	376.373	0.00545		69059.2	69.0592
		Oligopin							10.4867	10.9019	0.415196
		Oligopin							10.9019
		Oligopin							11.3171

## Sheet:  Flavonoids mgEQ g extract 
Flavonoids				mg (milligrams)	micrograms of quercetin	Total solid extract (g/ml)		1 g of extract contains micrograms of quercetin	1 g of extract contains mg of quercetin	average	standard deviation.
		T2R3A3	Extracto solido totales (mg/ml)	8.5	825.917	0.0085		97166.7	97.1667	98.9641	3.11316
		T2R3A3	Extracto solido totales (mg/ml)	8.5	825.917	0.0085		97166.7	97.1667
		T2R3A3	Extracto solido totales (mg/ml)	8.5	871.75	0.0085		102559	102.559
		T2R3A1	Extracto solido totales (mg/ml)	7.8	706.75	0.0078		90609	90.609	92.9594	2.03553
		T2R3A1	Extracto solido totales (mg/ml)	7.8	734.25	0.0078		94134.6	94.1346
		T2R3A1	Extracto solido totales (mg/ml)	7.8	734.25	0.0078		94134.6	94.1346
		T2R3A2	Extracto solido totales (mg/ml)	9.33	688.417	0.00933		73785.3	73.7853	75.7503	2.59943
		T2R3A2	Extracto solido totales (mg/ml)	9.33	734.25	0.00933		78697.7	78.6977
		T2R3A2	Extracto solido totales (mg/ml)	9.33	697.583	0.00933		74767.8	74.7678
		T3R3A3	Extracto solido totales (mg/ml)	9.625	935.917	0.009625		97238.1	97.2381	94.381	2.85714
		T3R3A3	Extracto solido totales (mg/ml)	9.625	908.417	0.009625		94381	94.381
		T3R3A3	Extracto solido totales (mg/ml)	9.625	880.917	0.009625		91523.8	91.5238
		T2R1A1	Extracto solido totales (mg/ml)	35.6	2090.92	0.0356		58733.6	58.7336	60.1069	1.29601
		T2R1A1	Extracto solido totales (mg/ml)	35.6	2145.92	0.0356		60278.6	60.2786
		T2R1A1	Extracto solido totales (mg/ml)	35.6	2182.58	0.0356		61308.5	61.3085
		T3R3A1	Extracto solido totales (mg/ml)	6.6	569.25	0.0066		86250	86.25	94.5833	8.33333
		T3R3A1	Extracto solido totales (mg/ml)	6.6	624.25	0.0066		94583.3	94.5833
		T3R3A1	Extracto solido totales (mg/ml)	6.6	679.25	0.0066		102917	102.917
		T3R3A2	Extracto solido totales (mg/ml)	5.58	404.25	0.00558		72446.2	72.4462	76.827	6.21943
		T3R3A2	Extracto solido totales (mg/ml)	5.58	468.417	0.00558		83945.6	83.9456
		T3R3A2	Extracto solido totales (mg/ml)	5.58	413.417	0.00558		74089	74.089
		T3R2A2	Extracto solido totales (mg/ml)	9.95	853.417	0.00995		85770.5	85.7705	86.6918	1.59569
		T3R2A2	Extracto solido totales (mg/ml)	9.95	880.917	0.00995		88534.3	88.5343
		T3R2A2	Extracto solido totales (mg/ml)	9.95	853.417	0.00995		85770.5	85.7705
		T3R2A1	Extracto solido totales (mg/ml)	28.2	688.417	0.0282		24411.9	24.4119	26.0372	1.6253
		T3R2A1	Extracto solido totales (mg/ml)	28.2	780.083	0.0282		27662.5	27.6625
		T3R2A1	Extracto solido totales (mg/ml)	28.2	734.25	0.0282		26037.2	26.0372
		T3R1A3	Extracto solido totales (mg/ml)	46.4	2686.75	0.0464		57904.1	57.9041	58.4968	0.712304
		T3R1A3	Extracto solido totales (mg/ml)	46.4	2705.08	0.0464		58299.2	58.2992
		T3R1A3	Extracto solido totales (mg/ml)	46.4	2750.92	0.0464		59287	59.287
		T3R1A2	Extracto solido totales (mg/ml)	46.45	1009.25	0.04645		21727.7	21.7277	24.3589	2.4832
		T3R1A2	Extracto solido totales (mg/ml)	46.45	1238.42	0.04645		26661.3	26.6613
		T3R1A2	Extracto solido totales (mg/ml)	46.45	1146.75	0.04645		24687.8	24.6878
		T3R2A3	Extracto solido totales (mg/ml)	18.25	1091.75	0.01825		59821.9	59.8219	62.5008	2.5281
		T3R2A3	Extracto solido totales (mg/ml)	18.25	1183.42	0.01825		64844.7	64.8447
		T3R2A3	Extracto solido totales (mg/ml)	18.25	1146.75	0.01825		62835.6	62.8356
		T3R1A1	Extracto solido totales (mg/ml)	50.65	1275.08	0.05065		25174.4	25.1744	25.2347	0.104489
		T3R1A1	Extracto solido totales (mg/ml)	50.65	1284.25	0.05065		25355.4	25.3554
		T3R1A1	Extracto solido totales (mg/ml)	50.65	1275.08	0.05065		25174.4	25.1744
		T2R1A2	Extracto solido totales (mg/ml)	30.2	2475.92	0.0302		81984	81.984	83.5017	1.32307
		T2R1A2	Extracto solido totales (mg/ml)	30.2	2549.25	0.0302		84412.3	84.4123
		T2R1A2	Extracto solido totales (mg/ml)	30.2	2540.08	0.0302		84108.7	84.1087
		T1R3A2	Extracto solido totales (mg/ml)	22.85	560.083	0.02285		24511.3	24.5113	24.7788	0.231614
		T1R3A2	Extracto solido totales (mg/ml)	22.85	569.25	0.02285		24912.5	24.9125
		T1R3A2	Extracto solido totales (mg/ml)	22.85	569.25	0.02285		24912.5	24.9125
		T1R2A3	Extracto solido totales (mg/ml)	7.05	440.917	0.00705		62541.4	62.5414	63.8416	1.30024
		T1R2A3	Extracto solido totales (mg/ml)	7.05	459.25	0.00705		65141.8	65.1418
		T1R2A3	Extracto solido totales (mg/ml)	7.05	450.083	0.00705		63841.6	63.8416
		T1R1A2	Extracto solido totales (mg/ml)	30.35	184.25	0.03035		6070.84	6.07084	7.27897	1.38408
		T1R1A2	Extracto solido totales (mg/ml)	30.35	211.75	0.03035		6976.94	6.97694
		T1R1A2	Extracto solido totales (mg/ml)	30.35	266.75	0.03035		8789.13	8.78913
		T1R1A3	Extracto solido totales (mg/ml)	30.55	376.75	0.03055		12332.2	12.3322	13.5325	1.08186
		T1R1A3	Extracto solido totales (mg/ml)	30.55	440.917	0.03055		14432.6	14.4326
		T1R1A3	Extracto solido totales (mg/ml)	30.55	422.583	0.03055		13832.5	13.8325
		T2R1A3	Extracto solido totales (mg/ml)	32.06	2769.25	0.03206		86377.1	86.3771	91.2378	4.32679
		T2R1A3	Extracto solido totales (mg/ml)	32.06	2970.92	0.03206		92667.4	92.6674
		T2R1A3	Extracto solido totales (mg/ml)	32.06	3035.08	0.03206		94668.9	94.6689
		T1R2A2	Extracto solido totales (mg/ml)	20.4	715.917	0.0204		35094	35.094	37.4905	2.26166
		T1R2A2	Extracto solido totales (mg/ml)	20.4	770.917	0.0204		37790	37.79
		T1R2A2	Extracto solido totales (mg/ml)	20.4	807.583	0.0204		39587.4	39.5874
		T1R3A3	Extracto solido totales (mg/ml)	22.45	275.917	0.02245		12290.3	12.2903	11.2014	1.02757
		T1R3A3	Extracto solido totales (mg/ml)	22.45	248.417	0.02245		11065.3	11.0653
		T1R3A3	Extracto solido totales (mg/ml)	22.45	230.083	0.02245		10248.7	10.2487
		T1R1A1	Extracto solido totales (mg/ml)	40.5	1302.58	0.0405		32162.6	32.1626	32.3134	1.58974
		T1R1A1	Extracto solido totales (mg/ml)	40.5	1375.92	0.0405		33973.3	33.9733
		T1R1A1	Extracto solido totales (mg/ml)	40.5	1247.58	0.0405		30804.5	30.8045
		T1R2A1	Extracto solido totales (mg/ml)	36.5	385.917	0.0365		10573.1	10.5731	11.4939	0.807307
		T1R2A1	Extracto solido totales (mg/ml)	36.5	431.75	0.0365		11828.8	11.8288
		T1R2A1	Extracto solido totales (mg/ml)	36.5	440.917	0.0365		12079.9	12.0799
		T1R3A1	Extracto solido totales (mg/ml)	32.4	220.917	0.0324		6818.42	6.81842	7.66718	0.848765
		T1R3A1	Extracto solido totales (mg/ml)	32.4	248.417	0.0324		7667.18	7.66718
		T1R3A1	Extracto solido totales (mg/ml)	32.4	275.917	0.0324		8515.95	8.51595
		T2R2A3	Extracto solido totales (mg/ml)	18.75	789.25	0.01875		42093.3	42.0933	44.0489	1.76271
		T2R2A3	Extracto solido totales (mg/ml)	18.75	835.083	0.01875		44537.8	44.5378
		T2R2A3	Extracto solido totales (mg/ml)	18.75	853.417	0.01875		45515.6	45.5156
		T2R2A2	Extracto solido totales (mg/ml)	7.75	19.25	0.00775		2483.87	2.48387	9.18638	6.06964
		T2R2A2	Extracto solido totales (mg/ml)	7.75	83.4167	0.00775		10763.4	10.7634
		T2R2A2	Extracto solido totales (mg/ml)	7.75	110.917	0.00775		14311.8	14.3118
		T2R2A1	Extracto solido totales (mg/ml)	5.45	477.583	0.00545		87630	87.63	83.7054	3.50127
		T2R2A1	Extracto solido totales (mg/ml)	5.45	450.083	0.00545		82584.1	82.5841
		T2R2A1	Extracto solido totales (mg/ml)	5.45	440.917	0.00545		80902.1	80.9021
		Oligopin							24.3008	25.9814	2.09901
		Oligopin							25.3092
		Oligopin							28.3342

## Sheet: Hydroxyl Radical IC50
Hydroxyl Radical			mg (milligrams)	IC50 (microliters)	IC50 (mL)	IC50 (mg/mL)
	T2R3A3	Extracto solido totales (mg/ml)	8.5	144.001	0.144001	1.22401
	T2R3A3	Extracto solido totales (mg/ml)	8.5	144.183	0.144183	1.22555
	T2R3A3	Extracto solido totales (mg/ml)	8.5	141.874	0.141874	1.20593
	T2R3A1	Extracto solido totales (mg/ml)	7.8	124.341	0.124341	0.969861
	T2R3A1	Extracto solido totales (mg/ml)	7.8	122.965	0.122965	0.95913
	T2R3A1	Extracto solido totales (mg/ml)	7.8	122.266	0.122266	0.953678
	T2R3A2	Extracto solido totales (mg/ml)	9.33	133.058	0.133058	1.24143
	T2R3A2	Extracto solido totales (mg/ml)	9.33	132.67	0.13267	1.23781
	T2R3A2	Extracto solido totales (mg/ml)	9.33	132.461	0.132461	1.23586
	T3R3A3	Extracto solido totales (mg/ml)	9.625	134.821	0.134821	1.29765
	T3R3A3	Extracto solido totales (mg/ml)	9.625	133.712	0.133712	1.28698
	T3R3A3	Extracto solido totales (mg/ml)	9.625	133.981	0.133981	1.28956
	T2R1A1	Extracto solido totales (mg/ml)	35.6	64.9469	0.0649469	2.31211
	T2R1A1	Extracto solido totales (mg/ml)	35.6	67.9258	0.0679258	2.41816
	T2R1A1	Extracto solido totales (mg/ml)	35.6	68.2726	0.0682726	2.43051
	T3R3A1	Extracto solido totales (mg/ml)	6.6	129.185	0.129185	0.852619
	T3R3A1	Extracto solido totales (mg/ml)	6.6	130.93	0.13093	0.864138
	T3R3A1	Extracto solido totales (mg/ml)	6.6	132.155	0.132155	0.872222
	T3R3A2	Extracto solido totales (mg/ml)	5.58	129.49	0.12949	0.722557
	T3R3A2	Extracto solido totales (mg/ml)	5.58	130.311	0.130311	0.727134
	T3R3A2	Extracto solido totales (mg/ml)	5.58	127.554	0.127554	0.711751
	T3R2A2	Extracto solido totales (mg/ml)	9.95	75.0568	0.0750568	0.746815
	T3R2A2	Extracto solido totales (mg/ml)	9.95	76.6256	0.0766256	0.762424
	T3R2A2	Extracto solido totales (mg/ml)	9.95	76.2672	0.0762672	0.758859
	T3R2A1	Extracto solido totales (mg/ml)	28.2	94.8467	0.0948467	2.67468
	T3R2A1	Extracto solido totales (mg/ml)	28.2	93.6833	0.0936833	2.64187
	T3R2A1	Extracto solido totales (mg/ml)	28.2	95.3096	0.0953096	2.68773
	T3R1A3	Extracto solido totales (mg/ml)	46.4	67.3798	0.0673798	3.12642
	T3R1A3	Extracto solido totales (mg/ml)	46.4	70.3141	0.0703141	3.26257
	T3R1A3	Extracto solido totales (mg/ml)	46.4	68.7203	0.0687203	3.18862
	T3R1A2	Extracto solido totales (mg/ml)	46.45	75.6309	0.0756309	3.51306
	T3R1A2	Extracto solido totales (mg/ml)	46.45	69.0576	0.0690576	3.20773
	T3R1A2	Extracto solido totales (mg/ml)	46.45	63.5858	0.0635858	2.95356
	T3R2A3	Extracto solido totales (mg/ml)	18.25	92.955	0.092955	1.69643
	T3R2A3	Extracto solido totales (mg/ml)	18.25	93.0508	0.0930508	1.69818
	T3R2A3	Extracto solido totales (mg/ml)	18.25	91.955	0.091955	1.67818
	T3R1A1	Extracto solido totales (mg/ml)	50.65	68.2547	0.0682547	3.4571
	T3R1A1	Extracto solido totales (mg/ml)	50.65	68.5987	0.0685987	3.47452
	T3R1A1	Extracto solido totales (mg/ml)	50.65	68.5394	0.0685394	3.47152
	T2R1A2	Extracto solido totales (mg/ml)	30.2	61.6072	0.0616072	1.86054
	T2R1A2	Extracto solido totales (mg/ml)	30.2	63.5341	0.0635341	1.91873
	T2R1A2	Extracto solido totales (mg/ml)	30.2	63.5858	0.0635858	1.92029
	T1R3A2	Extracto solido totales (mg/ml)	22.85	117.385	0.117385	2.68224
	T1R3A2	Extracto solido totales (mg/ml)	22.85	119.582	0.119582	2.73244
	T1R3A2	Extracto solido totales (mg/ml)	22.85	118.197	0.118197	2.70081
	T1R2A3	Extracto solido totales (mg/ml)	7.05	125.898	0.125898	0.887583
	T1R2A3	Extracto solido totales (mg/ml)	7.05	128.624	0.128624	0.906803
	T1R2A3	Extracto solido totales (mg/ml)	7.05	130.823	0.130823	0.922302
	T1R1A2	Extracto solido totales (mg/ml)	30.35	61.8412	0.0618412	1.87688
	T1R1A2	Extracto solido totales (mg/ml)	30.35	61.7976	0.0617976	1.87556
	T1R1A2	Extracto solido totales (mg/ml)	30.35	61.6528	0.0616528	1.87116
	T1R1A3	Extracto solido totales (mg/ml)	30.55	47.5978	0.0475978	1.45411
	T1R1A3	Extracto solido totales (mg/ml)	30.55	51.9109	0.0519109	1.58588
	T1R1A3	Extracto solido totales (mg/ml)	30.55	52.5271	0.0525271	1.6047
	T2R1A3	Extracto solido totales (mg/ml)	32.06	86.2019	0.0862019	2.76363
	T2R1A3	Extracto solido totales (mg/ml)	32.06	53.0672	0.0530672	1.70133
	T2R1A3	Extracto solido totales (mg/ml)	32.06	51.9359	0.0519359	1.66506
	T1R2A2	Extracto solido totales (mg/ml)	20.4	95.9538	0.0959538	1.95746
	T1R2A2	Extracto solido totales (mg/ml)	20.4	97.1705	0.0971705	1.98228
	T1R2A2	Extracto solido totales (mg/ml)	20.4	98.6289	0.0986289	2.01203
	T1R3A3	Extracto solido totales (mg/ml)	22.45	174.181	0.174181	3.91037
	T1R3A3	Extracto solido totales (mg/ml)	22.45	175.061	0.175061	3.93013
	T1R3A3	Extracto solido totales (mg/ml)	22.45	172.182	0.172182	3.86549
	T1R1A1	Extracto solido totales (mg/ml)	40.5	51.3755	0.0513755	2.08071
	T1R1A1	Extracto solido totales (mg/ml)	40.5	53.8584	0.0538584	2.18127
	T1R1A1	Extracto solido totales (mg/ml)	40.5	55.7404	0.0557404	2.25748
	T1R2A1	Extracto solido totales (mg/ml)	36.5	70.8747	0.0708747	2.58693
	T1R2A1	Extracto solido totales (mg/ml)	36.5	70.9842	0.0709842	2.59092
	T1R2A1	Extracto solido totales (mg/ml)	36.5	70.801	0.070801	2.58424
	T1R3A1	Extracto solido totales (mg/ml)	32.4	384.323	0.384323	12.4521
	T1R3A1	Extracto solido totales (mg/ml)	32.4	380.882	0.380882	12.3406
	T1R3A1	Extracto solido totales (mg/ml)	32.4	367.346	0.367346	11.902
	T2R2A3	Extracto solido totales (mg/ml)	18.75	124.695	0.124695	2.33803
	T2R2A3	Extracto solido totales (mg/ml)	18.75	123.188	0.123188	2.30977
	T2R2A3	Extracto solido totales (mg/ml)	18.75	122.604	0.122604	2.29882
	T2R2A2	Extracto solido totales (mg/ml)	7.75	114.701	0.114701	0.88893
	T2R2A2	Extracto solido totales (mg/ml)	7.75	116.682	0.116682	0.904285
	T2R2A2	Extracto solido totales (mg/ml)	7.75	112.271	0.112271	0.870104
	T2R2A1	Extracto solido totales (mg/ml)	5.45	376.359	0.376359	2.05116
	T2R2A1	Extracto solido totales (mg/ml)	5.45	352.015	0.352015	1.91848
	T2R2A1	Extracto solido totales (mg/ml)	5.45	359.546	0.359546	1.95953
	Oligopin	Extracto solido totales (mg/ml)				1.01793
	Oligopin	Extracto solido totales (mg/ml)				1.09819
	Oligopin	Extracto solido totales (mg/ml)				1.01793

## Sheet: DPPH IC50
DPPH			mg (milligrams)	IC50 (microliters)	IC50 (mL)	IC50 (mg/mL)	IC50 (µg/mL)
	T2R3A3	Extracto solido totales (mg/ml)	8.5	11.6798	0.0116798	0.0992781	99.2781
	T2R3A3	Extracto solido totales (mg/ml)	8.5	11.5138	0.0115138	0.0978677	97.8677
	T2R3A3	Extracto solido totales (mg/ml)	8.5	11.2328	0.0112328	0.0954785	95.4785
	T2R3A1	Extracto solido totales (mg/ml)	7.8	13.8195	0.0138195	0.107792	107.792
	T2R3A1	Extracto solido totales (mg/ml)	7.8	13.5482	0.0135482	0.105676	105.676
	T2R3A1	Extracto solido totales (mg/ml)	7.8	13.2688	0.0132688	0.103497	103.497
	T2R3A2	Extracto solido totales (mg/ml)	9.33	10.6529	0.0106529	0.0993915	99.3915
	T2R3A2	Extracto solido totales (mg/ml)	9.33	9.83987	0.00983987	0.091806	91.806
	T2R3A2	Extracto solido totales (mg/ml)	9.33	10.5437	0.0105437	0.0983727	98.3727
	T3R3A3	Extracto solido totales (mg/ml)	9.625	6.6438	0.0066438	0.0639466	63.9466
	T3R3A3	Extracto solido totales (mg/ml)	9.625	6.76046	0.00676046	0.0650695	65.0695
	T3R3A3	Extracto solido totales (mg/ml)	9.625	6.82505	0.00682505	0.0656911	65.6911
	T2R1A1	Extracto solido totales (mg/ml)	35.6	3.55668	0.00355668	0.126618	126.618
	T2R1A1	Extracto solido totales (mg/ml)	35.6	3.43664	0.00343664	0.122344	122.344
	T2R1A1	Extracto solido totales (mg/ml)	35.6	3.44201	0.00344201	0.122536	122.536
	T3R3A1	Extracto solido totales (mg/ml)	6.6	6.40772	0.00640772	0.042291	42.291
	T3R3A1	Extracto solido totales (mg/ml)	6.6	6.56471	0.00656471	0.0433271	43.3271
	T3R3A1	Extracto solido totales (mg/ml)	6.6	6.41295	0.00641295	0.0423254	42.3254
	T3R3A2	Extracto solido totales (mg/ml)	5.58	6.29342	0.00629342	0.0351173	35.1173
	T3R3A2	Extracto solido totales (mg/ml)	5.58	6.47372	0.00647372	0.0361233	36.1233
	T3R3A2	Extracto solido totales (mg/ml)	5.58	6.36399	0.00636399	0.0355111	35.5111
	T3R2A2	Extracto solido totales (mg/ml)	9.95	4.76966	0.00476966	0.0474581	47.4581
	T3R2A2	Extracto solido totales (mg/ml)	9.95	4.82976	0.00482976	0.0480562	48.0562
	T3R2A2	Extracto solido totales (mg/ml)	9.95	4.84517	0.00484517	0.0482094	48.2094
	T3R2A1	Extracto solido totales (mg/ml)	28.2	6.15959	0.00615959	0.1737	173.7
	T3R2A1	Extracto solido totales (mg/ml)	28.2	6.2588	0.0062588	0.176498	176.498
	T3R2A1	Extracto solido totales (mg/ml)	28.2	6.24443	0.00624443	0.176093	176.093
	T3R1A3	Extracto solido totales (mg/ml)	46.4	3.42549	0.00342549	0.158943	158.943
	T3R1A3	Extracto solido totales (mg/ml)	46.4	3.55488	0.00355488	0.164947	164.947
	T3R1A3	Extracto solido totales (mg/ml)	46.4	3.52798	0.00352798	0.163698	163.698
	T3R1A2	Extracto solido totales (mg/ml)	46.45	3.34079	0.00334079	0.15518	155.18
	T3R1A2	Extracto solido totales (mg/ml)	46.45	3.55488	0.00355488	0.165124	165.124
	T3R1A2	Extracto solido totales (mg/ml)	46.45	3.52798	0.00352798	0.163875	163.875
	T3R2A3	Extracto solido totales (mg/ml)	18.25	5.23872	0.00523872	0.0956066	95.6066
	T3R2A3	Extracto solido totales (mg/ml)	18.25	5.63283	0.00563283	0.102799	102.799
	T3R2A3	Extracto solido totales (mg/ml)	18.25	5.3902	0.0053902	0.0983711	98.3711
	T3R1A1	Extracto solido totales (mg/ml)	50.65	3.60817	0.00360817	0.182754	182.754
	T3R1A1	Extracto solido totales (mg/ml)	50.65	3.59697	0.00359697	0.182187	182.187
	T3R1A1	Extracto solido totales (mg/ml)	50.65	3.58936	0.00358936	0.181801	181.801
	T2R1A2	Extracto solido totales (mg/ml)	30.2	3.27025	0.00327025	0.0987615	98.7615
	T2R1A2	Extracto solido totales (mg/ml)	30.2	3.45919	0.00345919	0.104467	104.467
	T2R1A2	Extracto solido totales (mg/ml)	30.2	3.47309	0.00347309	0.104887	104.887
	T1R3A2	Extracto solido totales (mg/ml)	22.85	23.1912	0.0231912	0.52992	529.92
	T1R3A2	Extracto solido totales (mg/ml)	22.85	18.7208	0.0187208	0.427771	427.771
	T1R3A2	Extracto solido totales (mg/ml)	22.85	18.3562	0.0183562	0.41944	419.44
	T1R2A3	Extracto solido totales (mg/ml)	7.05	12.3222	0.0123222	0.0868717	86.8717
	T1R2A3	Extracto solido totales (mg/ml)	7.05	13.4485	0.0134485	0.0948122	94.8122
	T1R2A3	Extracto solido totales (mg/ml)	7.05	15.4077	0.0154077	0.108624	108.624
	T1R1A2	Extracto solido totales (mg/ml)	30.35	7.32156	0.00732156	0.222209	222.209
	T1R1A2	Extracto solido totales (mg/ml)	30.35	7.54701	0.00754701	0.229052	229.052
	T1R1A2	Extracto solido totales (mg/ml)	30.35	7.5104	0.0075104	0.22794	227.94
	T1R1A3	Extracto solido totales (mg/ml)	30.55	6.51587	0.00651587	0.19906	199.06
	T1R1A3	Extracto solido totales (mg/ml)	30.55	6.47526	0.00647526	0.197819	197.819
	T1R1A3	Extracto solido totales (mg/ml)	30.55	6.49101	0.00649101	0.1983	198.3
	T2R1A3	Extracto solido totales (mg/ml)	32.06	3.47224	0.00347224	0.11132	111.32
	T2R1A3	Extracto solido totales (mg/ml)	32.06	3.66681	0.00366681	0.117558	117.558
	T2R1A3	Extracto solido totales (mg/ml)	32.06	3.62162	0.00362162	0.116109	116.109
	T1R2A2	Extracto solido totales (mg/ml)	20.4	5.25701	0.00525701	0.107243	107.243
	T1R2A2	Extracto solido totales (mg/ml)	20.4	5.36814	0.00536814	0.10951	109.51
	T1R2A2	Extracto solido totales (mg/ml)	20.4	5.3162	0.0053162	0.10845	108.45
	T1R3A3	Extracto solido totales (mg/ml)	22.45	10.693	0.010693	0.240058	240.058
	T1R3A3	Extracto solido totales (mg/ml)	22.45	10.2604	0.0102604	0.230346	230.346
	T1R3A3	Extracto solido totales (mg/ml)	22.45	10.0369	0.0100369	0.225327	225.327
	T1R1A1	Extracto solido totales (mg/ml)	40.5	7.83298	0.00783298	0.317236	317.236
	T1R1A1	Extracto solido totales (mg/ml)	40.5	7.57645	0.00757645	0.306846	306.846
	T1R1A1	Extracto solido totales (mg/ml)	40.5	7.56603	0.00756603	0.306424	306.424
	T1R2A1	Extracto solido totales (mg/ml)	36.5	11.5929	0.0115929	0.423142	423.142
	T1R2A1	Extracto solido totales (mg/ml)	36.5	11.1252	0.0111252	0.406071	406.071
	T1R2A1	Extracto solido totales (mg/ml)	36.5	11.1407	0.0111407	0.406636	406.636
	T1R3A1	Extracto solido totales (mg/ml)	32.4	65.3753	0.0653753	2.11816	2118.16
	T1R3A1	Extracto solido totales (mg/ml)	32.4	48.2076	0.0482076	1.56193	1561.93
	T1R3A1	Extracto solido totales (mg/ml)	32.4	52.2118	0.0522118	1.69166	1691.66
	T2R2A3	Extracto solido totales (mg/ml)	18.75	17.0847	0.0170847	0.320339	320.339
	T2R2A3	Extracto solido totales (mg/ml)	18.75	14.9372	0.0149372	0.280072	280.072
	T2R2A3	Extracto solido totales (mg/ml)	18.75	14.8934	0.0148934	0.279251	279.251
	T2R2A2	Extracto solido totales (mg/ml)	7.75	17.4595	0.0174595	0.135311	135.311
	T2R2A2	Extracto solido totales (mg/ml)	7.75	14.3933	0.0143933	0.111548	111.548
	T2R2A2	Extracto solido totales (mg/ml)	7.75	16.2828	0.0162828	0.126192	126.192
	T2R2A1	Extracto solido totales (mg/ml)	5.45	22.4193	0.0224193	0.122185	122.185
	T2R2A1	Extracto solido totales (mg/ml)	5.45	21.4803	0.0214803	0.117067	117.067
	T2R2A1	Extracto solido totales (mg/ml)	5.45	20.5421	0.0205421	0.111954	111.954
	Ac. Galico					0.00246351	2.46351
	Ac. Galico					0.00232728	2.32728
	Ac. Galico					0.00228588	2.28588
	Ac. Abscorbico					0.00804385	8.04385
	Ac. Abscorbico					0.00837966	8.37966
	Ac. Abscorbico					0.00835006	8.35006

## Sheet: ABTS IC50 
ABTS			mg (milligrams)	IC50 (microliters)	IC50 (mL)	IC50 (mg/mL)	IC50 (µg/mL)						Trolox Equivalent Antioxidant Capacity (TEAC)			IC50 mg Dry Leaf	IC50 g Dry Leaf	TEAC	mg Extract	g Extract	TEAC (per 100 g Extract)
	T2R3A3	Extracto solido totales (mg/ml)	8.5	1.7985	0.0017985	0.0152873	15.2873							T2R3A3		0.0389826	3.89826e-05	311.134	8.5	0.0085	1.42692
	T2R3A3	Extracto solido totales (mg/ml)	8.5	1.76189	0.00176189	0.0149761	14.9761					Average trolox IC50 (mg/ml)	0.000121288	T2R3A3		0.038189	3.8189e-05	317.599	8.5	0.0085	1.42692
	T2R3A3	Extracto solido totales (mg/ml)	8.5	1.75826	0.00175826	0.0149452	14.9452							T2R3A3		0.0381103	3.81103e-05	318.255	8.5	0.0085	1.42692
	T2R3A1	Extracto solido totales (mg/ml)	7.8	1.76246	0.00176246	0.0137472	13.7472							T2R3A1		0.0382012	3.82012e-05	317.498	7.8	0.0078	1.55497
	T2R3A1	Extracto solido totales (mg/ml)	7.8	1.65268	0.00165268	0.0128909	12.8909							T2R3A1		0.0358219	3.58219e-05	338.586	7.8	0.0078	1.55497
	T2R3A1	Extracto solido totales (mg/ml)	7.8	1.64303	0.00164303	0.0128156	12.8156							T2R3A1		0.0356126	3.56126e-05	340.576	7.8	0.0078	1.55497
	T2R3A2	Extracto solido totales (mg/ml)	9.33	1.57386	0.00157386	0.0146841	14.6841							T2R3A2		0.0341133	3.41133e-05	355.544	9.33	0.00933	1.29998
	T2R3A2	Extracto solido totales (mg/ml)	9.33	1.56983	0.00156983	0.0146465	14.6465							T2R3A2		0.034026	3.4026e-05	356.456	9.33	0.00933	1.29998
	T2R3A2	Extracto solido totales (mg/ml)	9.33	1.56974	0.00156974	0.0146456	14.6456							T2R3A2		0.034024	3.4024e-05	356.477	9.33	0.00933	1.29998
	T3R3A3	Extracto solido totales (mg/ml)	9.625	1.42616	0.00142616	0.0137267	13.7267							T3R3A3		0.0309119	3.09119e-05	392.366	9.625	0.009625	1.26013
	T3R3A3	Extracto solido totales (mg/ml)	9.625	1.42621	0.00142621	0.0137272	13.7272							T3R3A3		0.030913	3.0913e-05	392.353	9.625	0.009625	1.26013
	T3R3A3	Extracto solido totales (mg/ml)	9.625	1.41619	0.00141619	0.0136308	13.6308							T3R3A3		0.0306959	3.06959e-05	395.128	9.625	0.009625	1.26013
	T2R1A1	Extracto solido totales (mg/ml)	35.6	1.13573	0.00113573	0.0404321	40.4321							T2R1A1		0.098468	9.8468e-05	123.175	35.6	0.0356	0.340696
	T2R1A1	Extracto solido totales (mg/ml)	35.6	1.13848	0.00113848	0.04053	40.53							T2R1A1		0.0987066	9.87066e-05	122.877	35.6	0.0356	0.340696
	T2R1A1	Extracto solido totales (mg/ml)	35.6	1.14405	0.00114405	0.0407282	40.7282							T2R1A1		0.0991891	9.91891e-05	122.28	35.6	0.0356	0.340696
	T3R3A1	Extracto solido totales (mg/ml)	6.6	1.62423	0.00162423	0.0107199	10.7199							T3R3A1		0.0352052	3.52052e-05	344.517	6.6	0.0066	1.8377
	T3R3A1	Extracto solido totales (mg/ml)	6.6	1.58568	0.00158568	0.0104655	10.4655							T3R3A1		0.0343697	3.43697e-05	352.892	6.6	0.0066	1.8377
	T3R3A1	Extracto solido totales (mg/ml)	6.6	1.62707	0.00162707	0.0107387	10.7387							T3R3A1		0.0352668	3.52668e-05	343.915	6.6	0.0066	1.8377
	T3R3A2	Extracto solido totales (mg/ml)	5.58	1.62418	0.00162418	0.00906292	9.06292							T3R3A2		0.0352041	3.52041e-05	344.528	5.58	0.00558	2.17362
	T3R3A2	Extracto solido totales (mg/ml)	5.58	1.6173	0.0016173	0.00902455	9.02455							T3R3A2		0.035055	3.5055e-05	345.993	5.58	0.00558	2.17362
	T3R3A2	Extracto solido totales (mg/ml)	5.58	1.6456	0.0016456	0.00918245	9.18245							T3R3A2		0.0356684	3.56684e-05	340.043	5.58	0.00558	2.17362
	T3R2A2	Extracto solido totales (mg/ml)	9.95	1.03503	0.00103503	0.0102986	10.2986							T3R2A2		0.0448687	4.48687e-05	270.317	9.95	0.00995	1.21897
	T3R2A2	Extracto solido totales (mg/ml)	9.95	1.03503	0.00103503	0.0102986	10.2986							T3R2A2		0.0448687	4.48687e-05	270.317	9.95	0.00995	1.21897
	T3R2A2	Extracto solido totales (mg/ml)	9.95	1.03503	0.00103503	0.0102986	10.2986							T3R2A2		0.0448687	4.48687e-05	270.317	9.95	0.00995	1.21897
	T3R2A1	Extracto solido totales (mg/ml)	28.2	1.37639	0.00137639	0.0388142	38.8142							T3R2A1		0.0596666	5.96666e-05	203.276	28.2	0.0282	0.430099
	T3R2A1	Extracto solido totales (mg/ml)	28.2	1.37639	0.00137639	0.0388142	38.8142							T3R2A1		0.0596666	5.96666e-05	203.276	28.2	0.0282	0.430099
	T3R2A1	Extracto solido totales (mg/ml)	28.2	1.3365	0.0013365	0.0376892	37.6892							T3R2A1		0.0579371	5.79371e-05	209.344	28.2	0.0282	0.430099
	T3R1A3	Extracto solido totales (mg/ml)	46.4	0.799995	0.000799995	0.0371198	37.1198							T3R1A3		0.0693596	6.93596e-05	174.868	46.4	0.0464	0.261396
	T3R1A3	Extracto solido totales (mg/ml)	46.4	0.805329	0.000805329	0.0373672	37.3672							T3R1A3		0.069822	6.9822e-05	173.71	46.4	0.0464	0.261396
	T3R1A3	Extracto solido totales (mg/ml)	46.4	0.80596	0.00080596	0.0373966	37.3966							T3R1A3		0.0698768	6.98768e-05	173.574	46.4	0.0464	0.261396
	T3R1A2	Extracto solido totales (mg/ml)	46.45	0.803265	0.000803265	0.0373117	37.3117							T3R1A2		0.0696431	6.96431e-05	174.156	46.45	0.04645	0.261115
	T3R1A2	Extracto solido totales (mg/ml)	46.45	0.808194	0.000808194	0.0375406	37.5406							T3R1A2		0.0700704	7.00704e-05	173.094	46.45	0.04645	0.261115
	T3R1A2	Extracto solido totales (mg/ml)	46.45	0.820096	0.000820096	0.0380935	38.0935							T3R1A2		0.0711023	7.11023e-05	170.582	46.45	0.04645	0.261115
	T3R2A3	Extracto solido totales (mg/ml)	18.25	1.04736	0.00104736	0.0191144	19.1144							T3R2A3		0.0454032	4.54032e-05	267.135	18.25	0.01825	0.664591
	T3R2A3	Extracto solido totales (mg/ml)	18.25	1.02746	0.00102746	0.0187511	18.7511							T3R2A3		0.0445404	4.45404e-05	272.31	18.25	0.01825	0.664591
	T3R2A3	Extracto solido totales (mg/ml)	18.25	1.04063	0.00104063	0.0189915	18.9915							T3R2A3		0.0451114	4.51114e-05	268.863	18.25	0.01825	0.664591
	T3R1A1	Extracto solido totales (mg/ml)	50.65	0.858117	0.000858117	0.0434636	43.4636							T3R1A1		0.0743987	7.43987e-05	163.024	50.65	0.05065	0.239463
	T3R1A1	Extracto solido totales (mg/ml)	50.65	0.879401	0.000879401	0.0445417	44.5417							T3R1A1		0.0762441	7.62441e-05	159.078	50.65	0.05065	0.239463
	T3R1A1	Extracto solido totales (mg/ml)	50.65	0.878275	0.000878275	0.0444846	44.4846							T3R1A1		0.0761464	7.61464e-05	159.283	50.65	0.05065	0.239463
	T2R1A2	Extracto solido totales (mg/ml)	30.2	0.98233	0.00098233	0.0296664	29.6664							T2R1A2		0.085168	8.5168e-05	142.41	30.2	0.0302	0.401616
	T2R1A2	Extracto solido totales (mg/ml)	30.2	0.979034	0.000979034	0.0295668	29.5668							T2R1A2		0.0848823	8.48823e-05	142.89	30.2	0.0302	0.401616
	T2R1A2	Extracto solido totales (mg/ml)	30.2	1.00378	0.00100378	0.030314	30.314							T2R1A2		0.0870273	8.70273e-05	139.368	30.2	0.0302	0.401616
	T1R3A2	Extracto solido totales (mg/ml)	22.85	1.67824	0.00167824	0.0383478	38.3478							T1R3A2		0.0363759	3.63759e-05	333.43	22.85	0.02285	0.530801
	T1R3A2	Extracto solido totales (mg/ml)	22.85	1.61087	0.00161087	0.0368084	36.8084							T1R3A2		0.0349156	3.49156e-05	347.374	22.85	0.02285	0.530801
	T1R3A2	Extracto solido totales (mg/ml)	22.85	1.64895	0.00164895	0.0376785	37.6785							T1R3A2		0.035741	3.5741e-05	339.352	22.85	0.02285	0.530801
	T1R2A3	Extracto solido totales (mg/ml)	7.05	1.52172	0.00152172	0.0107281	10.7281							T1R2A3		0.0659665	6.59665e-05	183.863	7.05	0.00705	1.7204
	T1R2A3	Extracto solido totales (mg/ml)	7.05	1.56105	0.00156105	0.0110054	11.0054							T1R2A3		0.0676715	6.76715e-05	179.231	7.05	0.00705	1.7204
	T1R2A3	Extracto solido totales (mg/ml)	7.05	1.56118	0.00156118	0.0110063	11.0063							T1R2A3		0.0676773	6.76773e-05	179.215	7.05	0.00705	1.7204
	T1R1A2	Extracto solido totales (mg/ml)	30.35	1.52468	0.00152468	0.0462742	46.2742							T1R1A2		0.13219	0.00013219	91.7527	30.35	0.03035	0.399631
	T1R1A2	Extracto solido totales (mg/ml)	30.35	1.51105	0.00151105	0.0458605	45.8605							T1R1A2		0.131008	0.000131008	92.5804	30.35	0.03035	0.399631
	T1R1A2	Extracto solido totales (mg/ml)	30.35	1.52293	0.00152293	0.046221	46.221							T1R1A2		0.132038	0.000132038	91.8583	30.35	0.03035	0.399631
	T1R1A3	Extracto solido totales (mg/ml)	30.55	1.04193	0.00104193	0.031831	31.831							T1R1A3		0.0903355	9.03355e-05	134.264	30.55	0.03055	0.397015
	T1R1A3	Extracto solido totales (mg/ml)	30.55	1.03811	0.00103811	0.0317143	31.7143							T1R1A3		0.0900043	9.00043e-05	134.758	30.55	0.03055	0.397015
	T1R1A3	Extracto solido totales (mg/ml)	30.55	1.04432	0.00104432	0.0319039	31.9039							T1R1A3		0.0905424	9.05424e-05	133.957	30.55	0.03055	0.397015
	T2R1A3	Extracto solido totales (mg/ml)	32.06	1.21107	0.00121107	0.0388268	38.8268							T2R1A3		0.104999	0.000104999	115.513	32.06	0.03206	0.378315
	T2R1A3	Extracto solido totales (mg/ml)	32.06	1.14715	0.00114715	0.0367776	36.7776							T2R1A3		0.0994579	9.94579e-05	121.949	32.06	0.03206	0.378315
	T2R1A3	Extracto solido totales (mg/ml)	32.06	1.12	0.00112	0.0359073	35.9073							T2R1A3		0.0971043	9.71043e-05	124.905	32.06	0.03206	0.378315
	T1R2A2	Extracto solido totales (mg/ml)	20.4	1.42547	0.00142547	0.0290795	29.0795							T1R2A2		0.0617939	6.17939e-05	196.278	20.4	0.0204	0.594549
	T1R2A2	Extracto solido totales (mg/ml)	20.4	1.37266	0.00137266	0.0280023	28.0023							T1R2A2		0.0595048	5.95048e-05	203.829	20.4	0.0204	0.594549
	T1R2A2	Extracto solido totales (mg/ml)	20.4	1.43321	0.00143321	0.0292376	29.2376							T1R2A2		0.0621298	6.21298e-05	195.217	20.4	0.0204	0.594549
	T1R3A3	Extracto solido totales (mg/ml)	22.45	1.81553	0.00181553	0.0407587	40.7587							T1R3A3		0.0393516	3.93516e-05	308.216	22.45	0.02245	0.540258
	T1R3A3	Extracto solido totales (mg/ml)	22.45	1.96101	0.00196101	0.0440246	44.0246							T1R3A3		0.0425048	4.25048e-05	285.351	22.45	0.02245	0.540258
	T1R3A3	Extracto solido totales (mg/ml)	22.45	1.89378	0.00189378	0.0425154	42.5154							T1R3A3		0.0410477	4.10477e-05	295.48	22.45	0.02245	0.540258
	T1R1A1	Extracto solido totales (mg/ml)	40.5	1.01798	0.00101798	0.0412282	41.2282							T1R1A1		0.0882589	8.82589e-05	137.423	40.5	0.0405	0.299476
	T1R1A1	Extracto solido totales (mg/ml)	40.5	0.989797	0.000989797	0.0400868	40.0868							T1R1A1		0.0858154	8.58154e-05	141.336	40.5	0.0405	0.299476
	T1R1A1	Extracto solido totales (mg/ml)	40.5	1.0307	0.0010307	0.0417434	41.7434							T1R1A1		0.0893618	8.93618e-05	135.727	40.5	0.0405	0.299476
	T1R2A1	Extracto solido totales (mg/ml)	36.5	1.72169	0.00172169	0.0628417	62.8417							T1R2A1		0.0746353	7.46353e-05	162.508	36.5	0.0365	0.332296
	T1R2A1	Extracto solido totales (mg/ml)	36.5	1.73605	0.00173605	0.0633658	63.3658							T1R2A1		0.0752577	7.52577e-05	161.163	36.5	0.0365	0.332296
	T1R2A1	Extracto solido totales (mg/ml)	36.5	1.72439	0.00172439	0.0629402	62.9402							T1R2A1		0.0747523	7.47523e-05	162.253	36.5	0.0365	0.332296
	T1R3A1	Extracto solido totales (mg/ml)	32.4	2.67482	0.00267482	0.086664	86.664							T1R3A1		0.0579766	5.79766e-05	209.201	32.4	0.0324	0.374346
	T1R3A1	Extracto solido totales (mg/ml)	32.4	2.4412	0.0024412	0.0790947	79.0947							T1R3A1		0.0529129	5.29129e-05	229.222	32.4	0.0324	0.374346
	T1R3A1	Extracto solido totales (mg/ml)	32.4	2.43686	0.00243686	0.0789542	78.9542							T1R3A1		0.0528189	5.28189e-05	229.63	32.4	0.0324	0.374346
	T2R2A3	Extracto solido totales (mg/ml)	18.75	1.42547	0.00142547	0.0267275	26.7275							T2R2A3		0.0617939	6.17939e-05	196.278	18.75	0.01875	0.646869
	T2R2A3	Extracto solido totales (mg/ml)	18.75	1.37266	0.00137266	0.0257374	25.7374							T2R2A3		0.0595048	5.95048e-05	203.829	18.75	0.01875	0.646869
	T2R2A3	Extracto solido totales (mg/ml)	18.75	1.43321	0.00143321	0.0268728	26.8728							T2R2A3		0.0621298	6.21298e-05	195.217	18.75	0.01875	0.646869
	T2R2A2	Extracto solido totales (mg/ml)	7.75	1.93322	0.00193322	0.0149824	14.9824							T2R2A2		0.083805	8.3805e-05	144.726	7.75	0.00775	1.56501
	T2R2A2	Extracto solido totales (mg/ml)	7.75	1.90129	0.00190129	0.014735	14.735							T2R2A2		0.0824211	8.24211e-05	147.156	7.75	0.00775	1.56501
	T2R2A2	Extracto solido totales (mg/ml)	7.75	1.94769	0.00194769	0.0150946	15.0946							T2R2A2		0.0844324	8.44324e-05	143.651	7.75	0.00775	1.56501
	T2R2A1	Extracto solido totales (mg/ml)	5.45	2.2121	0.0022121	0.0120559	12.0559							T2R2A1		0.0958946	9.58946e-05	126.481	5.45	0.00545	2.22547
	T2R2A1	Extracto solido totales (mg/ml)	5.45	2.03344	0.00203344	0.0110823	11.0823							T2R2A1		0.0881497	8.81497e-05	137.593	5.45	0.00545	2.22547
	T2R2A1	Extracto solido totales (mg/ml)	5.45	2.07301	0.00207301	0.0112979	11.2979							T2R2A1		0.0898651	8.98651e-05	134.967	5.45	0.00545	2.22547
	Ac. Galico					0.00090654	0.90654
	Ac. Galico					0.000899799	0.899799
	Ac. Galico					0.000944661	0.944661
	Trolox					0.000112405	0.112405
	Trolox					0.00012527	0.12527
	Trolox					0.000126189	0.126189
