# Supplementary material for: Multifactorial analysis of temperature, solute-to-solvent ratio, and ultrasound amplitude on the extraction of phenolic and antioxidant compounds from Aloysia citriodora Palau leaves
Source: PeerJ journal article supplement (doi:10.7717/peerj.19821), 2025-08-19

Figura 1. Fitting Model of Polyphenols as a Function of Temperature, Solute/Solvent Ratio, and Amplitude

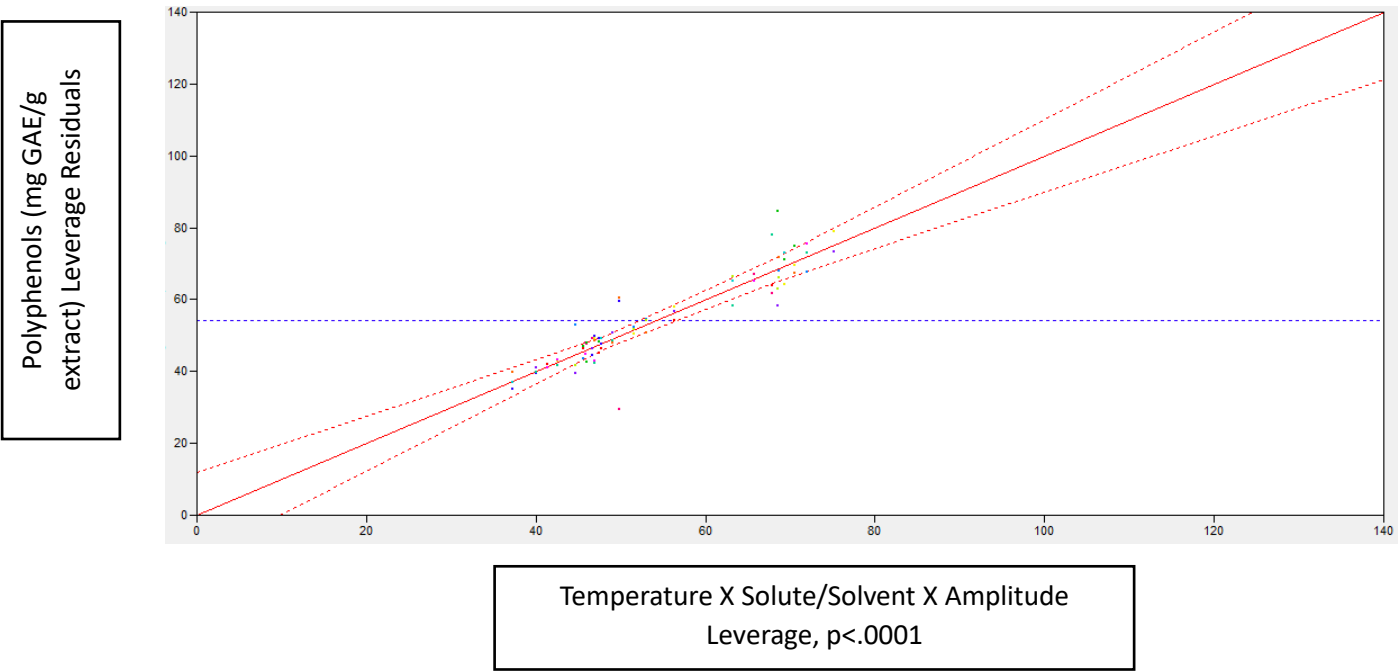

Supplement: Supplementary_Figure_1.pdf [file Supplementary_Figure_1.pdf]
