# Supplementary material for: Multifactorial analysis of temperature, solute-to-solvent ratio, and ultrasound amplitude on the extraction of phenolic and antioxidant compounds from Aloysia citriodora Palau leaves
Source: PeerJ journal article supplement (doi:10.7717/peerj.19821), 2025-08-19
Supplement: Supplementary_Figure_2.pdf [file Supplementary_Figure_2.pdf]

Figura 2. Fitting Model of Flavonoids as a Function of Temperature, Solute/Solvent Ratio, and Amplitude

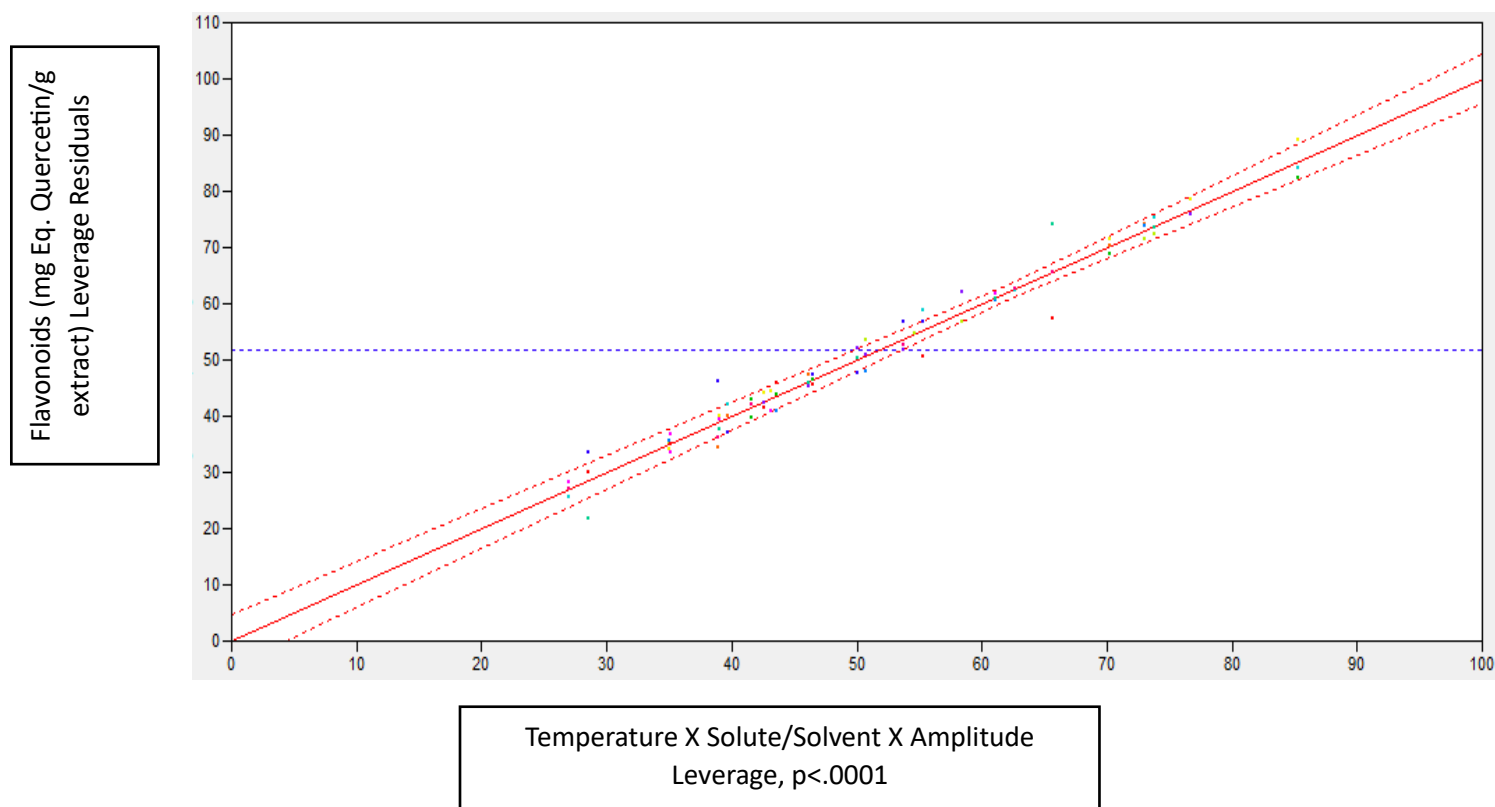

Equation 3. Prediction of Hydroxyl Radical (mg/mL)

IC50 Hydroxyl Radical (mg/mL)

$$\begin{aligned}
 &= 2.32 + a_1(\text{Temperature}) + a_2(\text{Solute/Solvent}) + a_3(\text{Amplitude}) \\
 &+ a_4(\text{Temperature} \times \text{Solute/Solvent}) + a_5(\text{Temperature} \times \text{Amplitude}) \\
 &+ a_6(\text{Solute/Solvent} \times \text{Amplitude}) \\
 &+ a_7(\text{Temperature} \times \text{Solute/Solvent} \times \text{Amplitude})
 \end{aligned}$$
