# Supplementary material for: Multifactorial analysis of temperature, solute-to-solvent ratio, and ultrasound amplitude on the extraction of phenolic and antioxidant compounds from Aloysia citriodora Palau leaves
Source: PeerJ journal article supplement (doi:10.7717/peerj.19821), 2025-08-19

Supplementary Material. Calibration Curves for Total Phenolic Content and  
Total Flavonoid Content Determination

### Standard curve of polyphenols

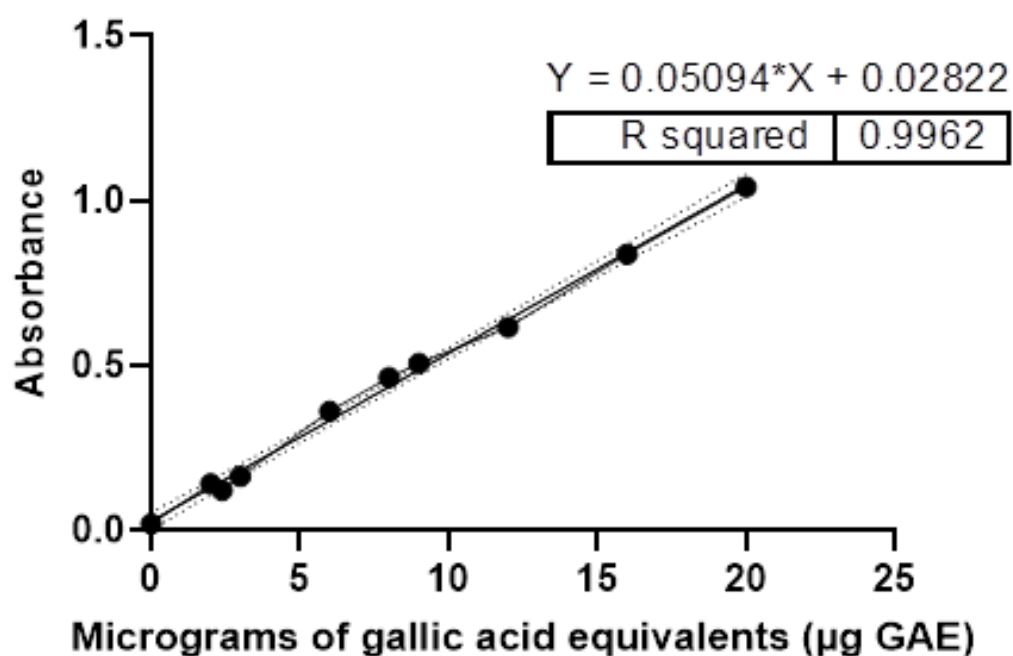

### Standard curve of flavonoid

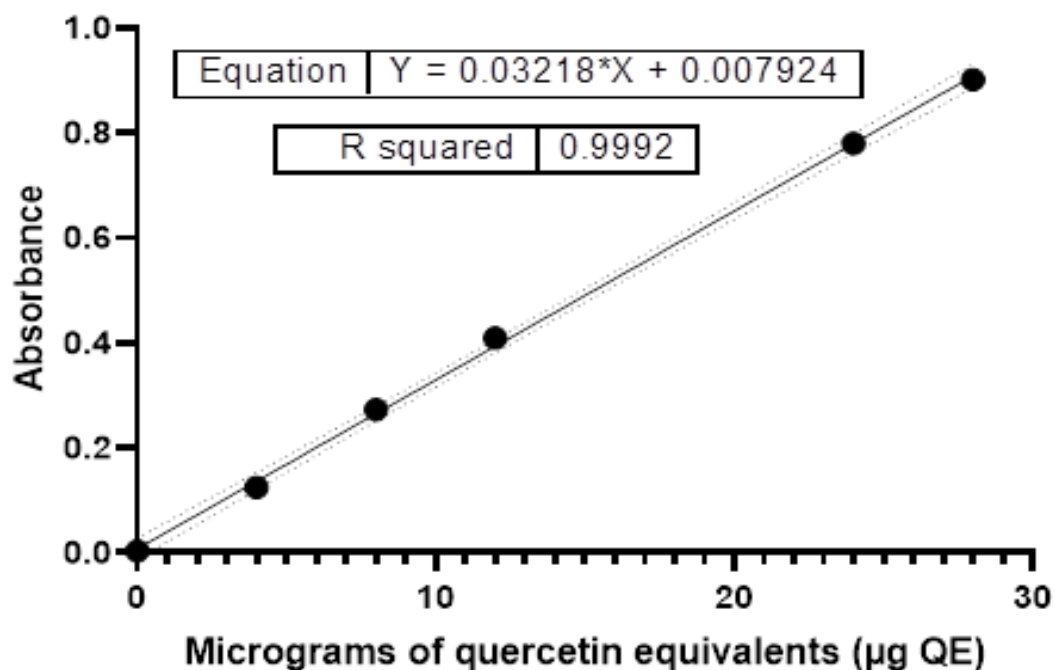

Supplement: Supplementary_Materia_5.pdf [file Supplementary_Materia_5.pdf]
